# Supplementary material
Source: Royal Society of Chemistry journal article supplement (doi:10.1039/d6sm00297h)
Supplement: d6sm00297h1.pdf [file d6sm00297h1.pdf]

## Supplementary information

### Viscous solvent embrittles long-chain polymer networks

Haeji Kim, Diogo Costa, Junsoo Kim\*

Department of Mechanical Engineering, Northwestern University, Evanston, Illinois 60208, United States

\*Junsoo Kim; Phone: +1 (847) 491-4322, e-mail: [junsoo.kim@northwestern.edu](mailto:junsoo.kim@northwestern.edu)

**Table S1.** Viscosity as a function of glycerol concentration  $\varphi_g$ .

| $\varphi_g$ (%) | $\eta$ (Pa·s) |
|-----------------|---------------|
| 0               | 1.00E-03      |
| 50              | 1.45E-02      |
| 75              | 1.31E-01      |
| 90              | 1.31E+00      |

**Table S2.** Swelling ratio of fully dried hydrogels over time.

| $\varphi_g$ (%) | Elapsed time (min) | Swelling ratio |
|-----------------|--------------------|----------------|
| 0               | 0                  | 1              |
| 0               | 15                 | 2.31           |
| 0               | 25                 | 3.51           |
| 0               | 40                 | 4.29           |
| 0               | 50                 | 4.75           |
| 0               | 56                 | 5.00           |
| 50              | 0                  | 1.00           |
| 50              | 15                 | 1.32           |
| 50              | 25                 | 1.60           |
| 50              | 40                 | 1.95           |
| 50              | 50                 | 2.26           |
| 50              | 95                 | 3.99           |
| 50              | 125                | 4.71           |

|    |     |      |
|----|-----|------|
| 50 | 165 | 5.06 |
| 75 | 0   | 1    |
| 75 | 60  | 1.81 |
| 75 | 180 | 3.99 |
| 75 | 200 | 4.59 |
| 75 | 250 | 4.66 |
| 75 | 300 | 5.09 |
| 90 | 0   | 1    |
| 90 | 180 | 1.40 |
| 90 | 360 | 2.03 |
| 90 | 480 | 3.75 |
| 90 | 600 | 5.06 |

**Table S3.** Comparison of modulus values with various values of  $\eta$  and two values of  $C$ .

| $\eta$ (Pa·s) | $C$      | Young's modulus (kPa) |
|---------------|----------|-----------------------|
| 1.00E-03      | 1.00E-03 | 204.02                |
| 1.00E-03      | 1.00E-03 | 202.82                |
| 1.00E-03      | 1.00E-03 | 163.01                |
| 1.00E-03      | 1.00E-03 | 80.84                 |
| 1.00E-03      | 1.00E-03 | 130.59                |
| 1.00E-02      | 1.00E-03 | 263.35                |
| 1.00E-02      | 1.00E-03 | 256.78                |
| 1.00E-02      | 1.00E-03 | 221.86                |
| 1.00E-02      | 1.00E-03 | 235.93                |
| 1.00E-02      | 1.00E-03 | 232.14                |
| 1.00E-01      | 1.00E-03 | 218.43                |
| 1.00E-01      | 1.00E-03 | 195.83                |
| 1.00E-01      | 1.00E-03 | 224.14                |
| 1.00E-01      | 1.00E-03 | 209.16                |
| 1.00E-01      | 1.00E-03 | 224.04                |
| 1.00E+00      | 1.00E-03 | 194.13                |

|          |          |        |
|----------|----------|--------|
| 1.00E+00 | 1.00E-03 | 210.35 |
| 1.00E+00 | 1.00E-03 | 247.97 |
| 1.00E+00 | 1.00E-03 | 170.96 |
| 1.00E+00 | 1.00E-03 | 185.71 |
| 1.00E-03 | 1.00E-05 | 480.06 |
| 1.00E-03 | 1.00E-05 | 494.62 |
| 1.00E-03 | 1.00E-05 | 439.1  |
| 1.00E-03 | 1.00E-05 | 473.15 |
| 1.00E-03 | 1.00E-05 | 487.82 |
| 1.00E-02 | 1.00E-05 | 499.96 |
| 1.00E-02 | 1.00E-05 | 481.45 |
| 1.00E-02 | 1.00E-05 | 493.71 |
| 1.00E-02 | 1.00E-05 | 532.21 |
| 1.00E-02 | 1.00E-05 | 522.81 |
| 1.00E-01 | 1.00E-05 | 520.01 |
| 1.00E-01 | 1.00E-05 | 499.37 |
| 1.00E-01 | 1.00E-05 | 486.57 |
| 1.00E-01 | 1.00E-05 | 458.76 |
| 1.00E-01 | 1.00E-05 | 495.96 |
| 1.00E+00 | 1.00E-05 | 503.06 |
| 1.00E+00 | 1.00E-05 | 528.06 |
| 1.00E+00 | 1.00E-05 | 522.14 |
| 1.00E+00 | 1.00E-05 | 475.36 |
| 1.00E+00 | 1.00E-05 | 510.67 |

**Table S4.** Comparison of strength values with various values of  $\eta$  and two values of C.

| $\eta$ (Pa·s) | C        | Strength (kPa) |
|---------------|----------|----------------|
| 1.00E-03      | 1.00E-03 | 1052           |
| 1.00E-03      | 1.00E-03 | 1314           |
| 1.00E-03      | 1.00E-03 | 1060.8         |
| 1.00E-03      | 1.00E-03 | 1327.6         |
| 1.00E-03      | 1.00E-03 | 1033.4         |

|          |          |        |
|----------|----------|--------|
| 1.00E-02 | 1.00E-03 | 1165.8 |
| 1.00E-02 | 1.00E-03 | 1076.1 |
| 1.00E-02 | 1.00E-03 | 944.53 |
| 1.00E-02 | 1.00E-03 | 938.58 |
| 1.00E-02 | 1.00E-03 | 851.68 |
| 1.00E-01 | 1.00E-03 | 700.68 |
| 1.00E-01 | 1.00E-03 | 696.13 |
| 1.00E-01 | 1.00E-03 | 731.9  |
| 1.00E-01 | 1.00E-03 | 693.15 |
| 1.00E-01 | 1.00E-03 | 687.78 |
| 1.00E+00 | 1.00E-03 | 276.23 |
| 1.00E+00 | 1.00E-03 | 299.51 |
| 1.00E+00 | 1.00E-03 | 335.15 |
| 1.00E+00 | 1.00E-03 | 314.12 |
| 1.00E+00 | 1.00E-03 | 307.08 |
| 1.00E-03 | 1.00E-05 | 698.13 |
| 1.00E-03 | 1.00E-05 | 1090.5 |
| 1.00E-03 | 1.00E-05 | 977.08 |
| 1.00E-03 | 1.00E-05 | 928.67 |
| 1.00E-03 | 1.00E-05 | 708.26 |
| 1.00E-02 | 1.00E-05 | 561.48 |
| 1.00E-02 | 1.00E-05 | 516.26 |
| 1.00E-02 | 1.00E-05 | 568.15 |
| 1.00E-02 | 1.00E-05 | 683.46 |
| 1.00E-02 | 1.00E-05 | 957.94 |
| 1.00E-01 | 1.00E-05 | 834.67 |
| 1.00E-01 | 1.00E-05 | 648.85 |
| 1.00E-01 | 1.00E-05 | 746.61 |
| 1.00E-01 | 1.00E-05 | 570.47 |
| 1.00E-01 | 1.00E-05 | 878.88 |
| 1.00E+00 | 1.00E-05 | 904.7  |
| 1.00E+00 | 1.00E-05 | 652.03 |

|          |          |        |
|----------|----------|--------|
| 1.00E+00 | 1.00E-05 | 703.91 |
| 1.00E+00 | 1.00E-05 | 688.46 |
| 1.00E+00 | 1.00E-05 | 821.72 |

**Table S5.** Comparison of stretchability values with various values of  $\eta$  and two values of  $C$ .

| $\eta$ (Pa·s) | $C$      | Stretchability |
|---------------|----------|----------------|
| 1.00E-03      | 1.00E-03 | 7.39           |
| 1.00E-03      | 1.00E-03 | 7.78           |
| 1.00E-03      | 1.00E-03 | 7.43           |
| 1.00E-03      | 1.00E-03 | 7.70           |
| 1.00E-03      | 1.00E-03 | 7.24           |
| 1.00E-02      | 1.00E-03 | 7.70           |
| 1.00E-02      | 1.00E-03 | 7.53           |
| 1.00E-02      | 1.00E-03 | 7.15           |
| 1.00E-02      | 1.00E-03 | 7.24           |
| 1.00E-02      | 1.00E-03 | 6.80           |
| 1.00E-01      | 1.00E-03 | 6.39           |
| 1.00E-01      | 1.00E-03 | 6.59           |
| 1.00E-01      | 1.00E-03 | 6.59           |
| 1.00E-01      | 1.00E-03 | 6.71           |
| 1.00E-01      | 1.00E-03 | 6.45           |
| 1.00E+00      | 1.00E-03 | 3.83           |
| 1.00E+00      | 1.00E-03 | 4.04           |
| 1.00E+00      | 1.00E-03 | 4.02           |
| 1.00E+00      | 1.00E-03 | 4.39           |
| 1.00E+00      | 1.00E-03 | 4.24           |
| 1.00E-03      | 1.00E-05 | 3.11           |
| 1.00E-03      | 1.00E-05 | 4.04           |
| 1.00E-03      | 1.00E-05 | 3.95           |
| 1.00E-03      | 1.00E-05 | 3.76           |
| 1.00E-03      | 1.00E-05 | 3.17           |
| 1.00E-02      | 1.00E-05 | 2.78           |

|          |          |        |
|----------|----------|--------|
| 1.00E-02 | 1.00E-05 | 2.64   |
| 1.00E-02 | 1.00E-05 | 2.77   |
| 1.00E-02 | 1.00E-05 | 3.06   |
| 1.00E-02 | 1.00E-05 | 3.60   |
| 1.00E-01 | 1.00E-05 | 3.35   |
| 1.00E-01 | 1.00E-05 | 3.00   |
| 1.00E-01 | 1.00E-05 | 3.27   |
| 1.00E-01 | 1.00E-05 | 2.85   |
| 1.00E-01 | 1.00E-05 | 3.52   |
| 1.00E+00 | 1.00E-05 | 3.68   |
| 1.00E+00 | 1.00E-05 | 3.03   |
| 1.00E+00 | 1.00E-05 | 3.14   |
| 1.00E+00 | 1.00E-05 | 3.2091 |
| 1.00E+00 | 1.00E-05 | 3.4292 |

**Table S6.** Comparison of toughness values with various values of  $\eta$  and two values of C.

| $\eta$ (Pa·s) | C        | Toughness (J/m <sup>2</sup> ) |
|---------------|----------|-------------------------------|
| 1.00E-03      | 1.00E-03 | 29.85                         |
| 1.00E-03      | 1.00E-03 | 56.24                         |
| 1.00E-03      | 1.00E-03 | 60.95                         |
| 1.00E-03      | 1.00E-03 | 29.85                         |
| 1.00E-02      | 1.00E-03 | 93.96                         |
| 1.00E-02      | 1.00E-03 | 88.14                         |
| 1.00E-02      | 1.00E-03 | 61.36                         |
| 1.00E-02      | 1.00E-03 | 54.16                         |
| 1.00E-01      | 1.00E-03 | 77.71                         |
| 1.00E-01      | 1.00E-03 | 86.95                         |
| 1.00E-01      | 1.00E-03 | 93.36                         |
| 1.00E-01      | 1.00E-03 | 110.1                         |
| 1.00E+00      | 1.00E-03 | 218.2                         |
| 1.00E+00      | 1.00E-03 | 230.1                         |
| 1.00E+00      | 1.00E-03 | 248.5                         |

|          |          |       |
|----------|----------|-------|
| 1.00E+00 | 1.00E-03 | 248.5 |
| 1.00E-03 | 1.00E-05 | 1388  |
| 1.00E-03 | 1.00E-05 | 1662  |
| 1.00E-03 | 1.00E-05 | 1612  |
| 1.00E-03 | 1.00E-05 | 1411  |
| 1.00E-02 | 1.00E-05 | 366.4 |
| 1.00E-02 | 1.00E-05 | 461.3 |
| 1.00E-02 | 1.00E-05 | 548.3 |
| 1.00E-02 | 1.00E-05 | 657.6 |
| 1.00E-01 | 1.00E-05 | 280.2 |
| 1.00E-01 | 1.00E-05 | 365.9 |
| 1.00E-01 | 1.00E-05 | 467.4 |
| 1.00E-01 | 1.00E-05 | 479.2 |
| 1.00E+00 | 1.00E-05 | 246.6 |
| 1.00E+00 | 1.00E-05 | 463.2 |
| 1.00E+00 | 1.00E-05 | 499.3 |
| 1.00E+00 | 1.00E-05 | 712.7 |

**Table S7.** The toughness  $\Gamma$  of the long-chain gels and the short-chain gels as a function of solvent viscosity  $\eta$ .

| $\eta$ (Pa·s) | $\nu$ | C        | Toughness (J/m <sup>2</sup> ) |
|---------------|-------|----------|-------------------------------|
| 1.00E-03      | 8     | 1.00E-05 | 2180                          |
| 1.00E-03      | 8     | 1.00E-05 | 1880                          |
| 1.00E-03      | 8     | 1.00E-05 | 2080                          |
| 1.00E-03      | 8     | 1.00E-05 | 2140                          |
| 1.00E-03      | 8     | 1.00E-05 | 1920                          |
| 1.00E-03      | 4     | 1.00E-05 | 2100                          |
| 1.00E-03      | 4     | 1.00E-05 | 2360                          |
| 1.00E-03      | 4     | 1.00E-05 | 2720                          |
| 1.00E-03      | 4     | 1.00E-05 | 2500                          |
| 1.00E-03      | 4     | 1.00E-05 | 2880                          |
| 1.00E-03      | 1     | 1.00E-05 | 4600                          |

|          |     |          |      |
|----------|-----|----------|------|
| 1.00E-03 | 1   | 1.00E-05 | 2600 |
| 1.00E-03 | 1   | 1.00E-05 | 5360 |
| 1.00E-03 | 1   | 1.00E-05 | 5460 |
| 1.00E-03 | 1   | 1.00E-05 | 5140 |
| 1.00E-03 | 0.5 | 1.00E-05 | 4220 |
| 1.00E-03 | 0.5 | 1.00E-05 | 5180 |
| 1.00E-03 | 0.5 | 1.00E-05 | 4980 |
| 1.00E-03 | 0.5 | 1.00E-05 | 3540 |
| 1.00E-03 | 0.5 | 1.00E-05 | 2740 |
| 1.00E-03 | 0.1 | 1.00E-05 | 7200 |
| 1.00E-03 | 0.1 | 1.00E-05 | 8700 |
| 1.00E-03 | 0.1 | 1.00E-05 | 2840 |
| 1.00E-03 | 0.1 | 1.00E-05 | 4780 |
| 1.00E-03 | 0.1 | 1.00E-05 | 2360 |
| 1.00E-02 | 8   | 1.00E-05 | 1040 |
| 1.00E-02 | 8   | 1.00E-05 | 920  |
| 1.00E-02 | 8   | 1.00E-05 | 900  |
| 1.00E-02 | 8   | 1.00E-05 | 820  |
| 1.00E-02 | 8   | 1.00E-05 | 840  |
| 1.00E-02 | 4   | 1.00E-05 | 1120 |
| 1.00E-02 | 4   | 1.00E-05 | 1080 |
| 1.00E-02 | 4   | 1.00E-05 | 1040 |
| 1.00E-02 | 4   | 1.00E-05 | 1020 |
| 1.00E-02 | 4   | 1.00E-05 | 1060 |
| 1.00E-02 | 1   | 1.00E-05 | 960  |
| 1.00E-02 | 1   | 1.00E-05 | 1000 |
| 1.00E-02 | 1   | 1.00E-05 | 1060 |
| 1.00E-02 | 1   | 1.00E-05 | 1280 |
| 1.00E-02 | 1   | 1.00E-05 | 1100 |
| 1.00E-02 | 0.5 | 1.00E-05 | 1220 |
| 1.00E-02 | 0.5 | 1.00E-05 | 940  |
| 1.00E-02 | 0.5 | 1.00E-05 | 1540 |

|          |     |          |      |
|----------|-----|----------|------|
| 1.00E-02 | 0.5 | 1.00E-05 | 1160 |
| 1.00E-02 | 0.5 | 1.00E-05 | 1140 |
| 1.00E-02 | 0.1 | 1.00E-05 | 5160 |
| 1.00E-02 | 0.1 | 1.00E-05 | 4400 |
| 1.00E-02 | 0.1 | 1.00E-05 | 960  |
| 1.00E-02 | 0.1 | 1.00E-05 | 860  |
| 1.00E-02 | 0.1 | 1.00E-05 | 1400 |
| 1.00E-01 | 8   | 1.00E-05 | 220  |
| 1.00E-01 | 8   | 1.00E-05 | 220  |
| 1.00E-01 | 8   | 1.00E-05 | 260  |
| 1.00E-01 | 8   | 1.00E-05 | 240  |
| 1.00E-01 | 8   | 1.00E-05 | 200  |
| 1.00E-01 | 4   | 1.00E-05 | 460  |
| 1.00E-01 | 4   | 1.00E-05 | 440  |
| 1.00E-01 | 4   | 1.00E-05 | 540  |
| 1.00E-01 | 4   | 1.00E-05 | 460  |
| 1.00E-01 | 4   | 1.00E-05 | 380  |
| 1.00E-01 | 1   | 1.00E-05 | 840  |
| 1.00E-01 | 1   | 1.00E-05 | 940  |
| 1.00E-01 | 1   | 1.00E-05 | 780  |
| 1.00E-01 | 1   | 1.00E-05 | 1000 |
| 1.00E-01 | 1   | 1.00E-05 | 840  |
| 1.00E-01 | 0.5 | 1.00E-05 | 1000 |
| 1.00E-01 | 0.5 | 1.00E-05 | 1260 |
| 1.00E-01 | 0.5 | 1.00E-05 | 1300 |
| 1.00E-01 | 0.5 | 1.00E-05 | 1180 |
| 1.00E-01 | 0.5 | 1.00E-05 | 1080 |
| 1.00E-01 | 0.1 | 1.00E-05 | 1300 |
| 1.00E-01 | 0.1 | 1.00E-05 | 1200 |
| 1.00E-01 | 0.1 | 1.00E-05 | 1400 |
| 1.00E-01 | 0.1 | 1.00E-05 | 1400 |
| 1.00E-01 | 0.1 | 1.00E-05 | 1300 |

|          |     |          |      |
|----------|-----|----------|------|
| 1.00E+00 | 8   | 1.00E-05 | 1040 |
| 1.00E+00 | 8   | 1.00E-05 | 860  |
| 1.00E+00 | 8   | 1.00E-05 | 940  |
| 1.00E+00 | 8   | 1.00E-05 | 680  |
| 1.00E+00 | 8   | 1.00E-05 | 700  |
| 1.00E+00 | 4   | 1.00E-05 | 460  |
| 1.00E+00 | 4   | 1.00E-05 | 640  |
| 1.00E+00 | 4   | 1.00E-05 | 620  |
| 1.00E+00 | 4   | 1.00E-05 | 500  |
| 1.00E+00 | 4   | 1.00E-05 | 420  |
| 1.00E+00 | 1   | 1.00E-05 | 660  |
| 1.00E+00 | 1   | 1.00E-05 | 720  |
| 1.00E+00 | 1   | 1.00E-05 | 540  |
| 1.00E+00 | 1   | 1.00E-05 | 600  |
| 1.00E+00 | 1   | 1.00E-05 | 700  |
| 1.00E+00 | 0.5 | 1.00E-05 | 560  |
| 1.00E+00 | 0.5 | 1.00E-05 | 700  |
| 1.00E+00 | 0.5 | 1.00E-05 | 580  |
| 1.00E+00 | 0.5 | 1.00E-05 | 480  |
| 1.00E+00 | 0.5 | 1.00E-05 | 520  |
| 1.00E+00 | 0.1 | 1.00E-05 | 900  |
| 1.00E+00 | 0.1 | 1.00E-05 | 840  |
| 1.00E+00 | 0.1 | 1.00E-05 | 700  |
| 1.00E+00 | 0.1 | 1.00E-05 | 680  |
| 1.00E+00 | 0.1 | 1.00E-05 | 920  |
| 1.00E-03 | 8   | 1.00E-03 | 340  |
| 1.00E-03 | 8   | 1.00E-03 | 400  |
| 1.00E-03 | 8   | 1.00E-03 | 300  |
| 1.00E-03 | 8   | 1.00E-03 | 280  |
| 1.00E-03 | 8   | 1.00E-03 | 320  |
| 1.00E-03 | 4   | 1.00E-03 | 160  |
| 1.00E-03 | 4   | 1.00E-03 | 140  |

|          |     |          |     |
|----------|-----|----------|-----|
| 1.00E-03 | 4   | 1.00E-03 | 120 |
| 1.00E-03 | 4   | 1.00E-03 | 160 |
| 1.00E-03 | 4   | 1.00E-03 | 140 |
| 1.00E-03 | 1   | 1.00E-03 | 280 |
| 1.00E-03 | 1   | 1.00E-03 | 300 |
| 1.00E-03 | 1   | 1.00E-03 | 260 |
| 1.00E-03 | 1   | 1.00E-03 | 280 |
| 1.00E-03 | 1   | 1.00E-03 | 260 |
| 1.00E-03 | 0.5 | 1.00E-03 | 260 |
| 1.00E-03 | 0.5 | 1.00E-03 | 280 |
| 1.00E-03 | 0.5 | 1.00E-03 | 280 |
| 1.00E-03 | 0.5 | 1.00E-03 | 280 |
| 1.00E-03 | 0.5 | 1.00E-03 | 260 |
| 1.00E-03 | 0.1 | 1.00E-03 | 260 |
| 1.00E-03 | 0.1 | 1.00E-03 | 260 |
| 1.00E-03 | 0.1 | 1.00E-03 | 300 |
| 1.00E-03 | 0.1 | 1.00E-03 | 320 |
| 1.00E-03 | 0.1 | 1.00E-03 | 200 |
| 1.00E-02 | 8   | 1.00E-03 | 160 |
| 1.00E-02 | 8   | 1.00E-03 | 140 |
| 1.00E-02 | 8   | 1.00E-03 | 140 |
| 1.00E-02 | 8   | 1.00E-03 | 140 |
| 1.00E-02 | 8   | 1.00E-03 | 140 |
| 1.00E-02 | 4   | 1.00E-03 | 40  |
| 1.00E-02 | 4   | 1.00E-03 | 40  |
| 1.00E-02 | 4   | 1.00E-03 | 20  |
| 1.00E-02 | 4   | 1.00E-03 | 20  |
| 1.00E-02 | 4   | 1.00E-03 | 20  |
| 1.00E-02 | 1   | 1.00E-03 | 180 |
| 1.00E-02 | 1   | 1.00E-03 | 200 |
| 1.00E-02 | 1   | 1.00E-03 | 180 |
| 1.00E-02 | 1   | 1.00E-03 | 180 |

|          |     |          |     |
|----------|-----|----------|-----|
| 1.00E-02 | 1   | 1.00E-03 | 200 |
| 1.00E-02 | 0.5 | 1.00E-03 | 180 |
| 1.00E-02 | 0.5 | 1.00E-03 | 140 |
| 1.00E-02 | 0.5 | 1.00E-03 | 100 |
| 1.00E-02 | 0.5 | 1.00E-03 | 100 |
| 1.00E-02 | 0.5 | 1.00E-03 | 60  |
| 1.00E-02 | 0.1 | 1.00E-03 | 380 |
| 1.00E-02 | 0.1 | 1.00E-03 | 360 |
| 1.00E-02 | 0.1 | 1.00E-03 | 380 |
| 1.00E-02 | 0.1 | 1.00E-03 | 340 |
| 1.00E-02 | 0.1 | 1.00E-03 | 420 |
| 1.00E-01 | 8   | 1.00E-03 | 260 |
| 1.00E-01 | 8   | 1.00E-03 | 220 |
| 1.00E-01 | 8   | 1.00E-03 | 200 |
| 1.00E-01 | 8   | 1.00E-03 | 180 |
| 1.00E-01 | 8   | 1.00E-03 | 180 |
| 1.00E-01 | 4   | 1.00E-03 | 160 |
| 1.00E-01 | 4   | 1.00E-03 | 160 |
| 1.00E-01 | 4   | 1.00E-03 | 140 |
| 1.00E-01 | 4   | 1.00E-03 | 180 |
| 1.00E-01 | 4   | 1.00E-03 | 160 |
| 1.00E-01 | 1   | 1.00E-03 | 220 |
| 1.00E-01 | 1   | 1.00E-03 | 220 |
| 1.00E-01 | 1   | 1.00E-03 | 240 |
| 1.00E-01 | 1   | 1.00E-03 | 200 |
| 1.00E-01 | 1   | 1.00E-03 | 200 |
| 1.00E-01 | 0.5 | 1.00E-03 | 160 |
| 1.00E-01 | 0.5 | 1.00E-03 | 160 |
| 1.00E-01 | 0.5 | 1.00E-03 | 160 |
| 1.00E-01 | 0.5 | 1.00E-03 | 160 |
| 1.00E-01 | 0.5 | 1.00E-03 | 140 |
| 1.00E-01 | 0.1 | 1.00E-03 | 300 |

|          |     |          |      |
|----------|-----|----------|------|
| 1.00E-01 | 0.1 | 1.00E-03 | 300  |
| 1.00E-01 | 0.1 | 1.00E-03 | 300  |
| 1.00E-01 | 0.1 | 1.00E-03 | 320  |
| 1.00E-01 | 0.1 | 1.00E-03 | 320  |
| 1.00E+00 | 8   | 1.00E-03 | 640  |
| 1.00E+00 | 8   | 1.00E-03 | 560  |
| 1.00E+00 | 8   | 1.00E-03 | 620  |
| 1.00E+00 | 8   | 1.00E-03 | 600  |
| 1.00E+00 | 8   | 1.00E-03 | 640  |
| 1.00E+00 | 4   | 1.00E-03 | 1580 |
| 1.00E+00 | 4   | 1.00E-03 | 1880 |
| 1.00E+00 | 4   | 1.00E-03 | 1900 |
| 1.00E+00 | 4   | 1.00E-03 | 1920 |
| 1.00E+00 | 4   | 1.00E-03 | 1920 |
| 1.00E+00 | 1   | 1.00E-03 | 300  |
| 1.00E+00 | 1   | 1.00E-03 | 260  |
| 1.00E+00 | 1   | 1.00E-03 | 240  |
| 1.00E+00 | 1   | 1.00E-03 | 280  |
| 1.00E+00 | 1   | 1.00E-03 | 300  |
| 1.00E+00 | 0.5 | 1.00E-03 | 320  |
| 1.00E+00 | 0.5 | 1.00E-03 | 320  |
| 1.00E+00 | 0.5 | 1.00E-03 | 340  |
| 1.00E+00 | 0.5 | 1.00E-03 | 360  |
| 1.00E+00 | 0.5 | 1.00E-03 | 380  |
| 1.00E+00 | 0.1 | 1.00E-03 | 280  |
| 1.00E+00 | 0.1 | 1.00E-03 | 280  |
| 1.00E+00 | 0.1 | 1.00E-03 | 280  |
| 1.00E+00 | 0.1 | 1.00E-03 | 340  |
| 1.00E+00 | 0.1 | 1.00E-03 | 300  |
